# Supplementary material for: Germline EPHB2 Receptor Variants in Familial Colorectal Cancer
Source: PLoS One. 2008 Aug 6;3(8):e2885. doi: 10.1371/journal.pone.0002885 (PMC2483346; doi:10.1371/journal.pone.0002885)
Supplement: Table S2 — (0.05 MB DOC) [file pone.0002885.s002.doc]

| **Table S2. Primer and Reaction Conditions for Genotyping and Radiolabled Sequencing Assays** | | | |
| --- | --- | --- | --- |
|  |  |  |  |
|  |  |  |  |
| **Missense** | **Primer Name** | **Sequence** | **Reaction Conditions:** |
| **Genotyped/Sequence** | (F= forward, R= reverse) |  |  |
|  |  |  |  |
| **nt. 1312 G-->A (A438T)** | EPHB2exon06F2 | CCACCTGTCCGAGTACCTCT | 2.5 mM MgCl2, 94oC 40 sec, 58oC 40 sec, 72oC 40 sec,  35 cycles |
| Thermo Sequenase Radiolabeled Terminator Cycle Seqiuencing | EPHB2exon06R2 | TAGTCCAGGATCACGCCATT |  |
|  |  |  |  |
| **nt. 1312 G-->A (A438T)** | EPHB2exon06F | ACCCATAGCCCTGCATGA | 3.0 mM MgCl2, 95oC 30 sec, 59oC 30 sec, 72oC 30 sec,  45 cycles |
| FP-SPE Genotyping | EPHB2exon06R3 | CCTGAGGTCTCACAGT | PCR products were cleaned using Exonuclease I, Shrimp alkaline phosphatase and pyrophosphatase at 37 oC for 45 min, then inactivated at 95oC for 25 min. |
|  | EPHB2exon06A438T (Probe) | GCCTCTCTTCCAGCTCCATCG | SBE reaction performed using 0.25uM probe, acycloterminator nucleotides and acyyclopolymerase at 54oC for 45 cycles. |
|  |  |  |  |
|  |  |  |  |
| **nt. 2035 G-->A (D679N)** | EPHB2exon11F2 | TGGCCATCAAGACGCTCAAGTC | 3.0 mM MgCl2, 95oC 30 sec, 55oC 55 sec, 72oC 30 sec,  40 cycles |
| SNPstream Genotyping | EPHB2exon11R2 | AGGGAGCCATTCTCCATGAACTCG | PCR products were treated with exonuclease I, shrimp alkaline phosphatase at 37oC for 30 min, then inactivated at 95oC for 10 min. Extension reactions and hybridizations to the Orchid UHT microarray plates were then performed. |
|  | EPHB2exon11F-U9 | GACCTGGGTGTCGATACCTACGAAG  CCTCCATCATGGGCCAGTTC |  |
|  |  |  |  |
|  |  |  |  |
| **nt. 2359 G-->A (G787R)** | EPHB2exon13F2 | CACAGGGTGGGAGGATTAAG | 2.5 mM MgCl2, 94oC 40 sec, 58oC 40 sec, 72oC 40 sec,  35 cycles |
| RLFP Genotyping | EPHB2exon13R2 | TCCGGTACTGGATGGCTTC | nt. 2359 G-->A abolishes EciI restriction site in PCR product |
| Thermo Sequenase Radiolabeled Terminator Cycle Seqiuencing |  |  |  |

|  |  |  |  |
| --- | --- | --- | --- |
|  |  |  |  |
|  |  |  |  |
|  |  |  |  |
|  |  |  |  |
|  |  |  |  |
|  |  |  |  |
|  |  |  |  |
|  |  |  |  |
|  |  |  |  |
|  |  |  |  |
